1 **Evolution of a *cis*-acting SNP that controls Type VI Secretion in *Vibrio cholerae***

2 Siu Lung Ng<sup>1,3,4</sup>, Sophia Kammann<sup>1,3,4</sup>, Gabi Steinbach<sup>2,4</sup>, Tobias Hoffmann<sup>1,3</sup>, Peter J

3 Yunker<sup>2,4</sup>, Brian K. Hammer<sup>1,3,4#</sup>

4 <sup>1</sup> School of Biological Sciences, Georgia Institute of Technology, Atlanta, Georgia, USA

5 <sup>2</sup> School of Physics, Georgia Institute of Technology, Atlanta, Georgia, USA

6 <sup>3</sup> Parker H. Petit Institute for Bioengineering & Bioscience, Georgia Institute of Technology,

7 Atlanta, Georgia, USA

8 <sup>4</sup> Center for Microbial Diseases and Infection, Georgia Institute of Technology, Atlanta,

9 Georgia, USA

10

11 #Corresponding author: [brian.hammer@biology.gatech.edu](mailto:brian.hammer@biology.gatech.edu)

12

13 Running title: Evolution of the *V. cholerae* T6SS by a *cis*-acting SNP

14 **Abstract**

15 Mutations in regulatory mechanisms that control gene expression contribute to phenotypic  
16 diversity and thus facilitate the adaptation of microbes and other organisms to new niches.  
17 Comparative genomics can be used to infer rewiring of regulatory architecture based on large  
18 effect mutations like loss or acquisition of transcription factors but may be insufficient to  
19 identify small changes in non-coding, intergenic DNA sequence of regulatory elements that  
20 drive phenotypic divergence. In human-derived *Vibrio cholerae*, the response to distinct  
21 chemical cues triggers production of multiple transcription factors that can regulate the Type  
22 VI Secretion System (T6), a broadly distributed weapon for interbacterial competition.  
23 However, to date, the signaling network remains poorly understood because no regulatory  
24 element has been identified for the major T6 locus. Here we identify a conserved *cis*-acting  
25 single nucleotide polymorphism (SNP) controlling T6 transcription and activity. Sequence  
26 alignment of the T6 regulatory region from diverse *V. cholerae* strains revealed conservation  
27 of the SNP that we rewired to interconvert *V. cholerae* T6 activity between chitin-inducible  
28 and constitutive states. This study supports a model of pathogen evolution through a non-  
29 coding *cis*-regulatory mutation and preexisting, active transcription factors that confers a  
30 different fitness advantage to tightly regulated strains inside a human host and unfettered  
31 strains adapted to environmental niches.

32

### 33 **Importance**

34 Organisms sense external cues with regulatory circuits that trigger the production of  
35 transcription factors, which bind specific DNA sequences at promoters (“*cis*” regulatory  
36 elements) to activate target genes. Mutations of transcription factors or their regulatory  
37 elements create phenotypic diversity, allowing exploitation of new niches. Waterborne  
38 pathogen *Vibrio cholerae* encodes the Type VI Secretion System “nanoweapon” to kill  
39 competitor cells when activated. Despite identification of several transcription factors, no  
40 regulatory element has been identified in the promoter of the major Type VI locus, to date.  
41 Combining phenotypic, genetic, and genomic analysis of diverse *V. cholerae* strains, we  
42 discovered a single nucleotide polymorphism in the Type VI promoter that switches its killing  
43 activity between a constitutive state beneficial outside hosts and an inducible state for  
44 constraint in a host. Our results support a role for non-coding DNA in adaptation of this  
45 pathogen.

46

### 47 **Introduction**

48 A central role in the dynamic, temporal control of gene expression is played by transcription  
49 factors (TFs), diffusible “*trans*” products that bind to molecular switches within DNA  
50 sequences termed “*cis*”-regulatory elements (CREs). In eukaryotes, which lack horizontal gene  
51 transfer (HGT), mutations in CREs that alter TF binding sites are major contributors to

52 phenotypic diversity ([1-3](#)). In bacteria, pervasive HGT of TFs can alter entire regulatory circuits  
53 that allow adaptation to new niches, as prominently demonstrated in *Vibrio fischeri*, where  
54 host range is altered by the presence or absence of RcsS, a TF of biofilm and colonization genes  
55 ([4, 5](#)). By contrast, specific mutations at CREs in non-coding DNA are more difficult to identify  
56 and receive less attention as drivers of phenotypic divergence and evolutionary adaptation  
57 ([6](#)). Thus, elucidation of how microbes adapt to new niches, a process of fundamental  
58 importance in bacterial pathogenesis, requires coupling of genome-wide computational  
59 methods with experimental approaches to map the *cis*- and *trans*-regulatory interactions  
60 across and within species.

61

62 To understand how mutations play a role in microbial adaptation, pathogenic viruses and  
63 bacteria with lifestyles that exploit niches within and outside a human host are of great  
64 interest. Following ingestion, pandemic strains of the bacterium *Vibrio cholerae* can colonize  
65 the human gastrointestinal tract and secrete the cholera toxin that leads to the often fatal  
66 diarrhea responsible for seven pandemics to date ([7-9](#)). Conversely, *V. cholerae* isolated from  
67 non-human niches lack the horizontally-acquired prophage that carries the cholera toxin, and  
68 cause mild illness ([10](#)). By contrast, all sequenced *V. cholerae* encode a Type VI Secretion  
69 System (T6), a broadly distributed “nano-harpoon” weapon that injects toxic effector proteins  
70 into neighboring bacterial cells, leading to cell envelope damage and cell lysis ([11, 12](#)). Due to

71 its broad distribution among bacteria including those of the human gut, there is intense  
72 interest in understanding the T6 interactions between our microbiota and foreign pathogens,  
73 and whether they can be manipulated to influence health ([13](#)).

74

75 *V. cholerae* obtained from humans carry a limited arsenal of effectors and a T6 believed to be  
76 tailored for *in vivo* success ([11](#), [14-19](#)), while strains from non-human niches encode a more  
77 diverse effector repertoire ([11](#), [14](#), [20](#), [21](#)). To date, however, adaptative evolution  
78 mechanisms of T6 regulation in *V. cholerae* derived from non-human sources have largely  
79 been overlooked. Studies of human-derived strains identify two primary TFs for T6 activation  
80 ([22-26](#)). T6 control in pandemic strains (e.g. C6706 and A1552) requires QstR (Quorum-  
81 Sensing and Chitin-Dependent Regulator), which integrates multiple external cues ([27-30](#)),  
82 and contains a DNA binding domain postulated to interact with a presumptive CRE of the  
83 major T6 gene cluster ([23](#), [27](#)). T6 regulation in non-pandemic strain V52, which causes mild  
84 disease, requires TfoY, modulatable by intracellular signals, including cyclic di-GMP ([25](#), [26](#)).  
85 How QstR and TfoY control T6 transcription remains elusive, with no T6 CRE yet described.  
86 Elucidation of the differences in intraspecies T6 regulatory mechanisms between diverse *V.*  
87 *cholerae* isolates will provide insights into how pathogens emerge from nonpathogenic  
88 progenitors.

89

90 To understand the regulatory differences in *V. cholerae* strains, we examine here several  
91 environmental isolates that exhibit T6-mediated killing (31). Despite encoding functional  
92 signaling circuitry and TFs, we find that QstR is dispensable for killing and that TfoY plays only  
93 a minor role in the strains tested. Thus, existing regulatory models fail to explain the T6 control  
94 in *V. cholerae* from human and non-human sources. Genomic analysis identifies one  
95 conserved non-coding single-nucleotide polymorphism (SNP) that we show interconverts *V.*  
96 *cholerae* T6 activity between chitin-inducible and constitutive states, which are QstR-  
97 dependent and TfoY-independent, respectively. We demonstrate that non-coding SNPs can  
98 rewire *cis*-regulatory elements to aid in adaptation of bacteria to different niches, including  
99 the human host.

100

## 101 **Results and Discussion**

### 102 Constitutive, *in vitro* T6 activity requires neither QstR nor TfoY.

103 In pandemic C6706, high cell density conditions (HCD) and chitin are required for induction of  
104 *qstR* which leads to activation of T6 genes. In the absence of chitin, C6706 with *qstR* expressed  
105 from a heterologous promoter (defined here as *qstR\**) reduces survival of *Escherichia coli*  
106 “target” cells in co-culture by over 4-orders of magnitude (~10,000), compared to wildtype  
107 (WT) C6706, a T6<sup>-</sup> strain with a mutation in an essential structural gene ( $\Delta$ *vask*), and a strain  
108 with a  $\Delta$ *qstR* mutation (Fig. 1A) (29). Deletion of *tfoY* does not reduce the killing activity of the

109 T6<sup>+</sup> *qstR*\* strain, but eliminates the robust killing in the non-pandemic strain V52 (serogroup  
110 O37), which requires TfoY but not QstR (Fig. 1B) ([26](#)).

111

112 To determine whether QstR or TfoY participates in control of the T6 in non-human strains, we  
113 examined 3223-74, a genetically-amenable, T6-proficient environmental strain ([31](#)). Like V52,  
114 3223-74 does not require QstR to efficiently kill *E. coli* in conditions without chitin, but  
115 surprisingly, also does not require TfoY. Isogenic strains carrying the  $\Delta tfoY$  and  $\Delta qstR \Delta tfoY$   
116 mutations retain >99.99% killing activity, with only modest *E. coli* survival (Fig. 1C). Gene  
117 fusions of the 5' intergenic region (IGR) of the major T6 cluster of each strain fused to green  
118 fluorescent protein (*gfp*) confirm that transcriptional differences account for the killing  
119 observed, with maximal *gfp* expression mirroring activity (i.e. low *E. coli* survival with high *gfp*  
120 expression, and *vice versa*) (Fig. 1D-F). Confocal microscopy reinforces the negligible role of  
121 TfoY on killing by 3223-74, with a  $\Delta tfoY$  mutation having little effect on killing WT (Fig. 1G).  
122 Transcription of plasmid-borne reporters is significantly higher in *V. cholerae* than in *E. coli*  
123 (Fig. S1), supporting a hypothesis that an additional *V. cholerae*-specific regulator of the T6  
124 may remain to be identified (Fig. S1).

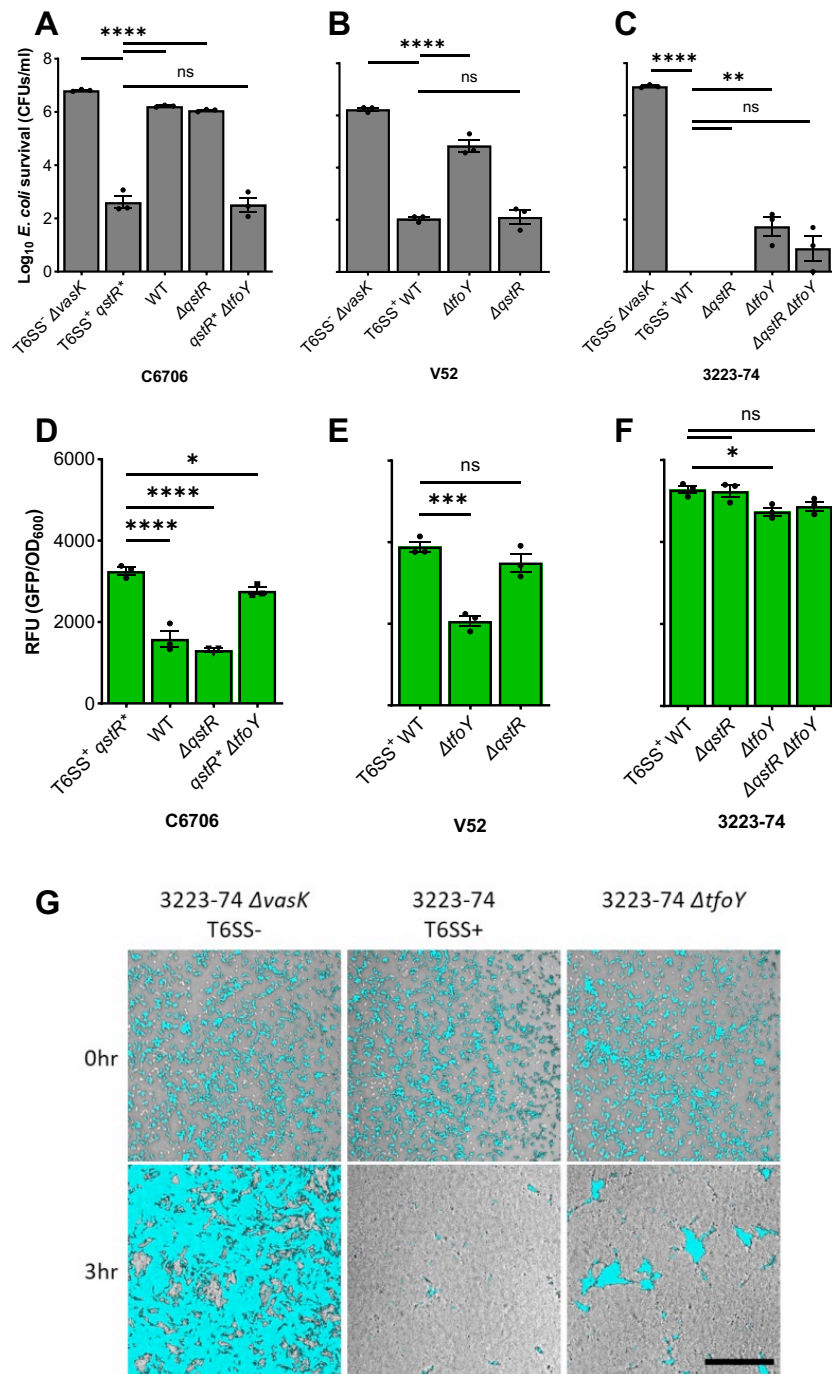

125

126 **Figure 1. *Vibrio cholerae* 3223-74 T6 activity is QstR- and TfoY-independent.** (A-C) *V. cholerae*

127 strains with the indicated genotypes were co-cultured with chloramphenicol resistant (Cm<sup>r</sup>) *E.*

128 *coli* followed by determination of *E. coli* survival by counting of colony forming units (CFUs) on

129 LB agar with Cm. (D-F) Fluorescence levels are from reporters with *gfp* fused to the intergenic



130 region 5' of *vipA* derived from the three strains shown. The mean value  $\pm$  S.E. of three  
131 independent co-cultures (A-C) and monocultures (D-F) are shown from one experiment, with  
132 similar results obtained in at least two other independent experiments. A one-way ANOVA  
133 with Dunnett post-hoc test was conducted to determine the significance: ns denotes not  
134 significant, \*\*\*\* $p \leq 0.0001$ , \*\*\* $p \leq 0.001$ , \*\* $p \leq 0.01$ , \* $p \leq 0.05$ . (G) *E. coli* cells expressing  
135 constitutive *gfp* were competed against 3223-74, with the same frame imaged at 0 h and 3 h  
136 by confocal microscopy. In the images, *gfp* signal from the *E. coli* is overlaid on top of bright-  
137 light images of the co-culture. Scale bar = 50  $\mu\text{m}$ .

138

139 To probe each strain's T6-related regulatory circuitry, we measured canonical behaviors under  
140 control of HapR, QstR and TfoY; quorum sensing (QS) controlled bioluminescence, natural  
141 transformation, and motility, respectively ([32-34](#)). As expected, each TF is intact in C6706; but  
142 like several *V. cholerae* strains, V52 lacks a functional *hapR* gene that prevents QS and natural  
143 transformation ([35, 36](#)). Nonetheless, V52 encodes a functional *tfoY* that controls motility (Fig.  
144 2A-B) ([37](#)). Interestingly, the regulatory circuitry of *V. cholerae* 3223-74 is intact, like C6706,  
145 confirming that it encodes functional TFs (Fig. 2C), which are nonetheless expendable for T6-  
146 mediated killing. Because transposon mutagenesis failed to identify a novel T6 activator (not  
147 shown), we suspect regulation may be complex, perhaps involving more than one TF specific  
148 to *V. cholerae*. Nucleoid Associated Proteins (NAPs) that bind DNA both specifically and non-

149 specifically (38) may also contribute, since they are present in both species, likely regulated  
 150 differently (39), and participate in regulation of many promoters in numerous bacteria  
 151 including *Vibrios* (40).

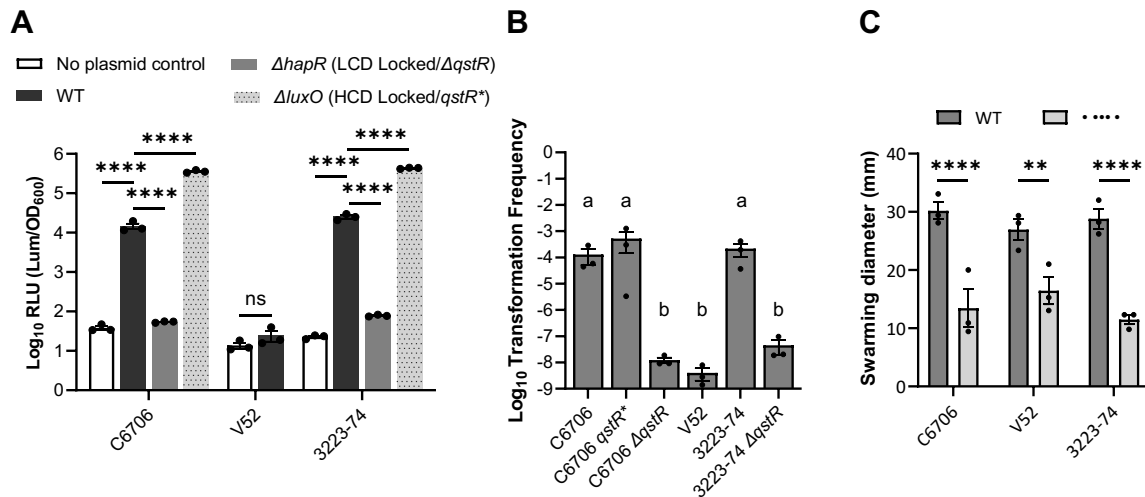

152  
 153 **Figure 2. *Vibrio cholerae* 3223-74 encodes functional HapR, QstR, and TfoY.** (A) *V. cholerae*  
 154 strains were grown in liquid LB with relative luminescence units per OD<sub>600</sub> measured at HCD  
 155 (OD<sub>600</sub> = 0.6-0.8). Statistical analyses were conducted with one-way ANOVA with Tukey post-  
 156 hoc test (C6706 and 3223-74) and one-tailed student's t-test (V52). LCD – Low Cell Density. (B)  
 157 *V. cholerae* strains with the indicated genotypes were grown in ASW with crab shell and  
 158 exogenous Spec-marked genomic DNA. Transformation frequency = Spec<sup>r</sup> CFU ml<sup>-1</sup> / total CFU  
 159 ml<sup>-1</sup>. Statistical analyses were conducted with one-way ANOVA with Tukey post-hoc test.  
 160 Significance is denoted by letters. (C) *V. cholerae* strains were inoculated on 0.3% LB agar and  
 161 grew overnight. Statistical analyses were conducted with one-tailed student's t-test. Colony  
 162 diameters were physically measured from the furthest edges. All data shown are the mean ±

163 S.E. from one experiment, with similar results were obtained in at least two other  
164 independent experiments. ns: not significant, \*\*\*\* $p \leq 0.0001$ , \*\* $p \leq 0.01$ .

165

#### 166 A SNP in the T6 intergenic region confers QstR-dependency.

167 Human and environmental isolates of *V. cholerae* we have characterized prior (31) share  $\geq 97\%$   
168 average nucleotide identity with many chromosomal differences (11), but inspection of the  
169 T6 IGRs of C6706, V52 and 3223-74 revealed only 17 SNPs and 3 multinucleotide  
170 polymorphisms (Fig. 3A), which we hypothesized could contribute to the differences in T6  
171 transcription and killing activity observed. To address this, we replaced the T6 IGR of C6706  
172 on the chromosome with that from V52 and 3223-74 and measured killing activity. While  
173 C6706 carrying the *qstR\** allele, but not WT, adeptly kills *E. coli*, both IGR replacements  
174 increase the killing efficiency of WT C6706 by 5- to 6-orders of magnitude (Fig. 3B), mimicking  
175 the robust killing observed by WT V52 and 3223-74 (Fig. 1B-C). Deletion of *tfoY* in C6706 with  
176 V52's IGR increases *E. coli* survival ( $\sim 2$ -logs), as observed with V52, but does not alter *E. coli*  
177 survival with 3223-74's IGR (Fig. 3B). Chromosomal transcriptional *gfp* reporters with identical  
178 mutations were elevated relative to WT C6706 in each IGR replacement strain (Fig. 3C),  
179 consistent with the enhanced killing detected. These results support a hypothesis that a novel  
180 CRE lies within the IGR 5' of the T6 locus, despite a lack of any known direct TF-DNA  
181 interactions at this locus identified to date.

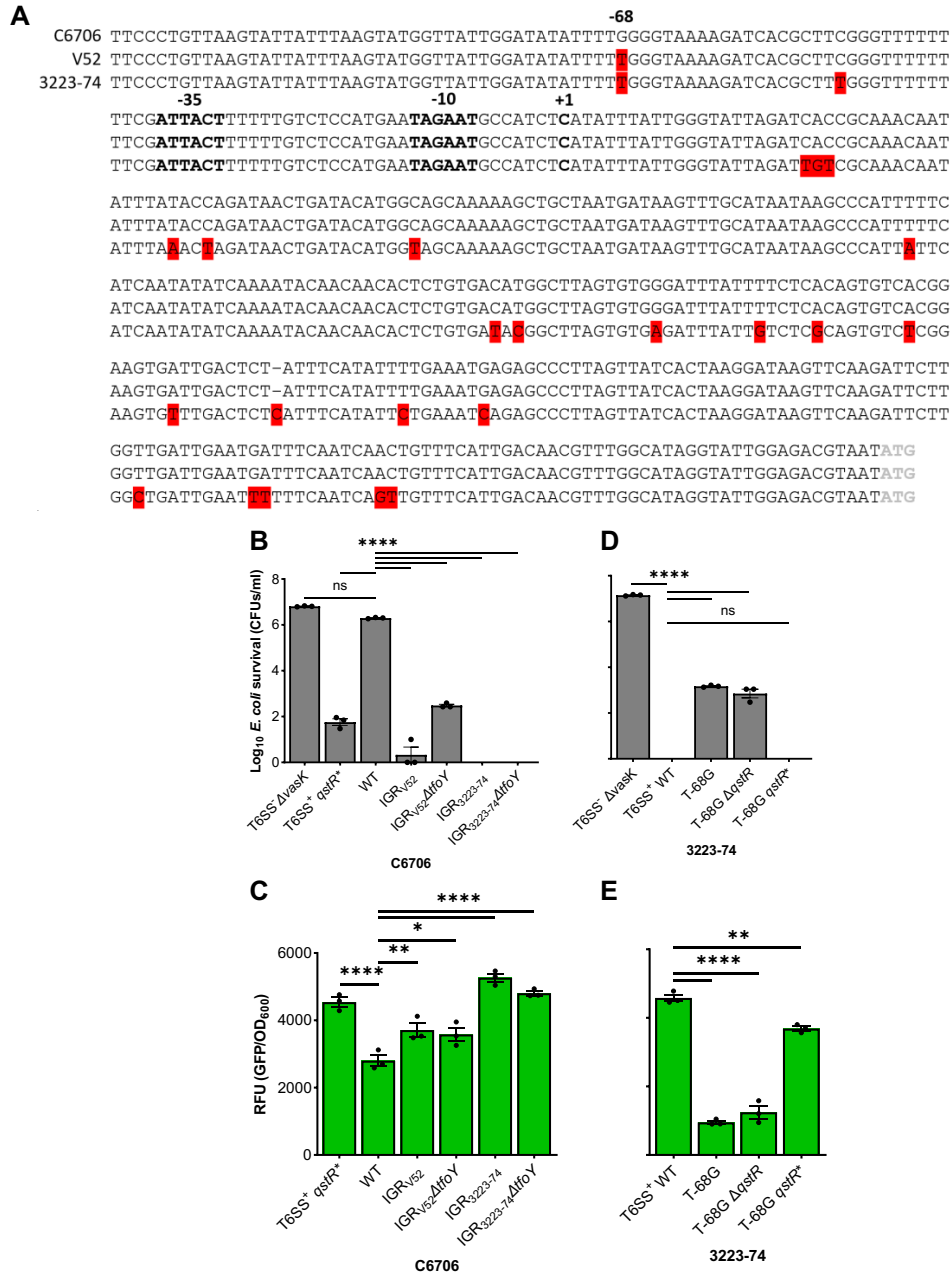

182

183 **Figure 3. G-388T mutation abolishes QstR dependence in C6706 and T-388G confers QstR**

184 **dependence to 3223-74.** (A) Alignment of the IGR upstream of *vipA* was conducted using

185 MUSCLE. SNPs and MNPs are highlighted in red, one gap indicated with a “—”, the putative

186 promoter and the transcriptional start site (TSS; +1) in bold, and the start codon of *vipA* in

187 grey. (B) the C6706 5' IGR of *vipA* was replaced with the IGR from either V52 or 3223-74. (D)

188 A T-68G mutation in the 5' IGR of *vipA* was introduced into 3223-74 with different *qstR* alleles.  
189 Competition assays were conducted by co-culturing *V. cholerae* killers and Cm<sup>r</sup> *E. coli* target  
190 followed by determination of *E. coli* survival by counting of colony forming units (CFUs) on LB  
191 agar with Cm. (C, E) Shown are fluorescence levels of transcriptional reporters with *gfp* fused  
192 to corresponding IGRs of *vipA* expressed in either C6706 (C) or 3223-74 (E). The mean value  $\pm$   
193 S.E. of three independent co-cultures (B and D) and monocultures (C and E) are shown from  
194 one experiment, with similar results were obtained in at least two other independent  
195 experiments. A one-way ANOVA with Dunnett post-hoc test was conducted to determine the  
196 significance - ns: not significant, \*\*\*\* $p \leq 0.0001$ , \*\* $p \leq 0.01$ , \* $p \leq 0.05$ .

197

198 To begin mapping the T6 IGR region and SNP locations, we experimentally determined the  
199 transcriptional start site (+1) by 5' Rapid Amplification of cDNA Ends (Methods). The +1 of  
200 transcription resides 320 nucleotides (nt) 5' of the ATG of the first T6 gene (*vipA*), and adjacent  
201 to a putative promoter with 8/12 identical nts compared to the consensus sigma70-  
202 dependent promoter (Fig. 3A). The +1 is consistent with paired-end RNAseq results we have  
203 reported prior (29). Because the majority of 5' untranslated regions (UTRs) in *V. cholerae* are  
204 20-40 nt, with few exceeding 300 nt (41), we speculate that the 320 nt 5' UTR of the major T6  
205 gene cluster may be post-transcriptionally regulated, beyond the sRNA interactions already  
206 described near the ribosome binding site (RBS) (42). Alignment of the IGRs of C6706 and V52

207 reveals a single SNP at -68, with a guanine (G) in C6706 at that position and a thymine (T) in  
208 V52 (Fig. 3A).

209

210 The replacement of the C6706 IGR with V52 was effectively a G-68T mutation (Fig. 3B-C), thus  
211 we further tested whether G was necessary for QstR activation by replacing the T with a G at  
212 position -68 (T-68G) in the 3223-74 WT, *qstR\**, and  $\Delta qstR$  backgrounds. The T-68G mutation  
213 significantly increases *E. coli* survival and decreases T6 transcription in WT 3223-74 and the  
214  $\Delta qstR$  derivative, with killing restored in the strain with the *qstR\** allele (Fig. 3D-E). Thus, a G  
215 at position -68 confers inducible, QstR-control, while a T results in constitutive killing *in vitro*,  
216 consistent with results recently reported ([43](#)). Based on these results we predicted this SNP is  
217 a result of adaptive evolution to control T6 activity in different environments.

218

219 The SNP at -68 is evolutionarily conserved.

220 To determine whether the SNP at -68 is prevalence in *V. cholerae*, we aligned the T6 IGR  
221 sequences of diverse strains that we have characterized prior for T6 killing activity (Fig. 4A)  
222 ([31](#)). Consistent with prior studies ([11](#), [14](#), [16](#), [18](#)), our phylogenetic analysis (Methods) of the  
223 T6 IGRs places human strains in a distinct clade, with the exception of two O1 strains isolated  
224 nearly a century ago (NCTC8457 and MAK757), and two non-O1 strains (MZO-2 O14 and V52  
225 O37; Fig. S2). All 23 environmental isolates carry the T-68 SNP and displays constitutive T6

226 activity, with one exception that is chitin-inducible (1496-86) (Fig. 4A, S4). By contrast, the 18  
227 human isolates tested carry either G or T at the -68 position (Fig. 4A, S5). The 13 chitin-  
228 inducible human isolates carry a G; five show constitutive activity and carry a T like  
229 environmental strains, with one exception that is constitutive yet carries the G (2010EL-1749)  
230 (Fig. 4A, S5). Neither C nor A are observed at -68 in any strains tested, although both pyrimidine  
231 nucleotides (T and C) confer constitutive killing at -68, and both purines (G and A) behave  
232 similarly (Fig. S3). The focal SNP location is distal from the promoter, but inconsistent with AT-  
233 rich “UP elements” that reside immediately upstream of the promoter at -38 to -59 and  
234 interact directly with the alpha subunit of RNAP (44). We propose the SNP is more likely a  
235 component of a CRE for a TF to be determined. Indeed, transversion mutations have greater  
236 effects of TF binding than transitions, as noted here (Fig. S3) likely due to changes in shape of  
237 the DNA backbone or DNA-amino acid contacts (45, 46).

238

239 We examined regulation of three additional genetically manipulatable environmental strains  
240 (VC22, 2479-89, and 2512-86) that exhibit T6 killing (31). Like 3223-74, QstR is expendable in  
241 each strain (Fig. 4B-E) while TfoY contributes to some extent in activating T6, with varying *E.*  
242 *coli* recovery observed in each derivative carrying the  $\Delta tfoY$  mutation (Fig. 4B-E). Taken  
243 together, our findings reveal that the constitutive T6 killing activity of environmental *V.*  
244 *cholerae* is driven by a T at position -68, which obviates the QstR requirement, and permits

245 modest TfoY regulation.

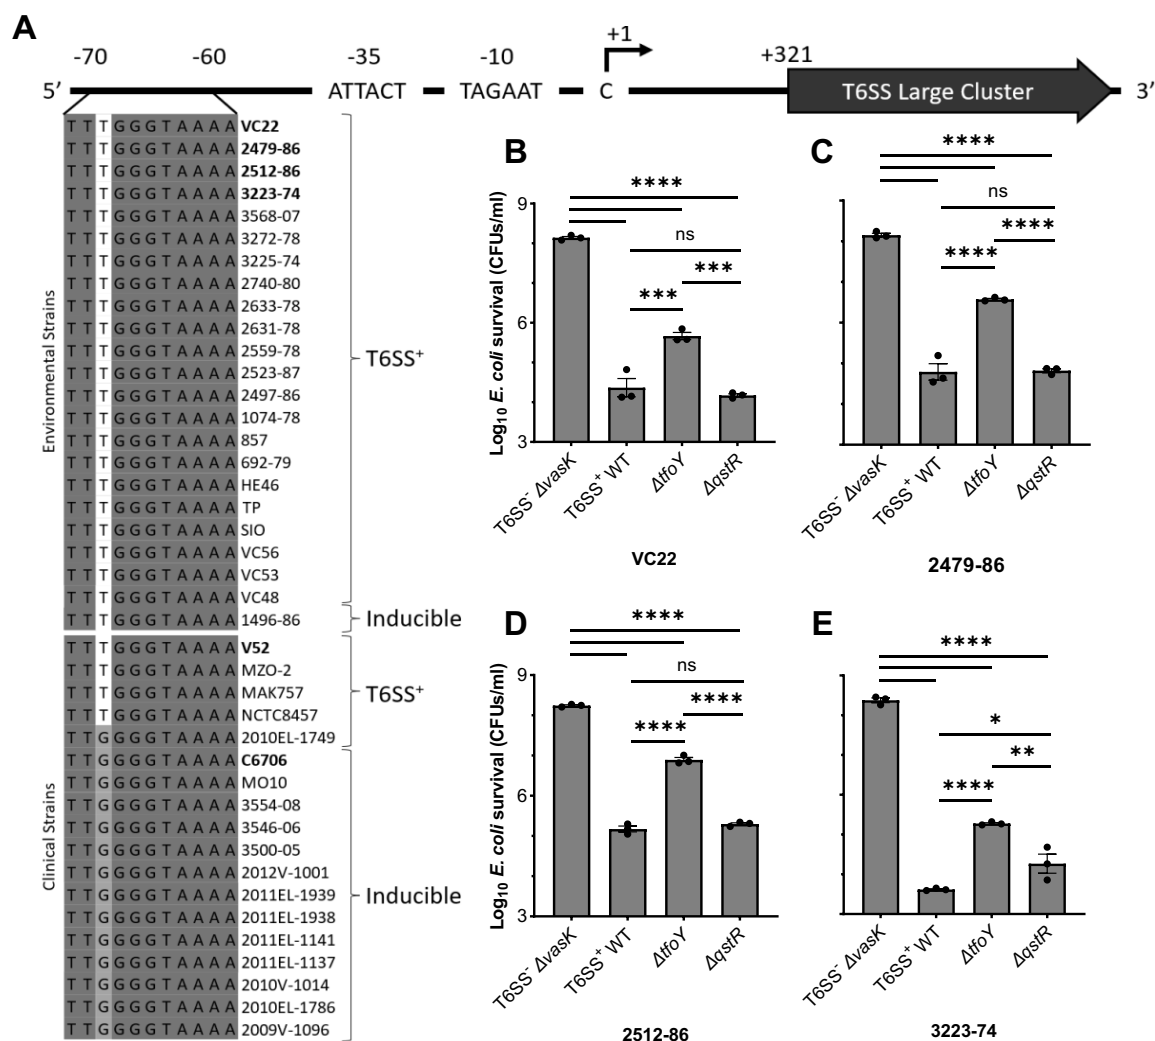

246

247 **Figure 4. Environmental *V. cholerae* isolates encode a T at position -68 while human, chitin-**

248 **induced isolates encode a G. (A) A SNP at position -68 in the IGR of the major T6 cluster**

249 **controls killing activity. Conserved nts are in dark grey and the SNP of interest is highlighted in**

250 **white/grey. T6 control was categorized as described (31). (B-E) Survival of *E. coli* following**

251 **competition assays with WT *V. cholerae* strains and mutants was determined by CFU counts.**

252 **Data shown are the mean ± S.E. of three independent experiments. A one-way ANOVA with**



253 Tukey post-hoc test was conducted to determine the significance - ns: not significant, \*\*\*\* $p \leq$   
254 0.0001, \*\*\* $p \leq 0.001$ , \*\* $p \leq 0.01$ , \* $p \leq 0.05$ .

255

256 Bacterial adaptation to unexploited niches can be the result of horizontal gene transfer events  
257 (5) as well as mutations in protein coding and promoter regions (47, 48). Here we describe an  
258 intergenic non-coding SNP that coordinates adaptation by altering T6 control between two  
259 states – one that is inducible and the other that displays constitutive activity. While the first  
260 Type VI Secretion System was first described in *V. cholerae* in 2006, the knowledge of its  
261 regulation remains largely restricted to human isolates and incomplete, with the identity of a  
262 TF that directly controls the major T6 cluster elusive to this date (22, 24). We speculate that  
263 the focal SNP we identified at position -68 is a component of a CRE that contributes to  
264 pathoadaptation (Fig. 3A), a result of adaptive evolution, which allows *V. cholerae* to carefully  
265 control the T6SS expression in specific environments. Our results are consistent with the  
266 hypothesis that constitutive T6SS is beneficial in aquatic environments outside a human host  
267 (49), with varying degrees of TfoY contribution, which may act directly or indirectly at the  
268 transcriptional or posttranscriptional level (Fig. 3A and Fig. 4B-E, S4, S5). During human  
269 infection where selection promotes dampened T6SS, *V. cholerae* with a T-to-G mutation  
270 (inducible T6) are favored. In fact, T6-deficient human isolates (e.g. O395) have been reported  
271 to have less competitive fitness in human intestinal colonization and infection (19, 50).

272 Although low level, basal expression of T6 contributes to pathogenesis of C6706 (51),  
273 overexpression of T6SS may be deleterious in vivo. Indeed, we have reported prior that *V.*  
274 *cholerae* with constitutive T6SS induces violent peristaltic contractions in a fish host (52),  
275 which may disrupt the interaction between *V. cholerae* and the gut microflora.

276

277 There remains a pressing public health need to understand the emergence of pathogens from  
278 environmental reservoirs (53). Efforts such as Microbial Genome Wide Association Studies (54)  
279 to identify genetic variants in genomes that are associated with phenotypes like virulence and  
280 antibiotic sensitivity, will be bolstered by knowledge of the ecological and evolutionary  
281 processes that promote pathogen-host association. Defining the plasticity of the regulatory  
282 circuitry controlling the T6 weapon will provide insights into the role of polymorphisms in the  
283 evolution of this and other pathogens.

284

## 285 **Materials and Methods**

### 286 Bacterial growth conditions and plasmid constructions

287 All *V. cholerae* and *E. coli* (Table S1) strains were grown aerobically at 37 °C overnight in  
288 Lysogeny Broth (LB) with constant shaking or statically on LB agar. Ampicillin (100 µg/ml),  
289 kanamycin (50 µg/ml), chloramphenicol (10 µg/ml), spectinomycin (100 µg/ml), streptomycin  
290 (5 mg/ml), sucrose (20% w/v) and diaminopimelic acid (50 µg/ml) were supplemented where

291 appropriate.

292

293 Plasmids (Table S2) used were constructed with DNA restriction nucleases (Promega – WI,  
294 USA), Gibson Assembly mix (New England Biolabs – MA, USA), and PCR amplification (Qiagen  
295 - Hilden, Germany) by PCR with Q5 polymerase (New England Biolabs – MA, USA), and primers  
296 (Table S3) generated by Eton Bioscience Inc (NC, USA) or Eurofins Genomics (KY, USA). All  
297 reagents were used according to the manufacturer’s instructions. Plasmids were confirmed  
298 by PCR and Sanger sequencing by Eton Bioscience Inc (NC, USA).

299

### 300 *V. cholerae* mutant construction

301 All genetically engineered strains of *V. cholerae* were constructed with established allelic  
302 exchange methods using vector pKAS32 (55) and pRE118 (Addgene - Plasmid #43830). All  
303 Insertions, deletions, and mutations were confirmed by PCR and Sanger sequencing  
304 conducted by Eton Bioscience Inc (NC, USA). Primers used are in Table S3.

305

### 306 Fluorescence microscopy

307 *V. cholerae* 3223-74 strains and chromosomal-labeled GFP *E. coli* were separately back-diluted  
308 1:100 and incubated at 37 °C for 3 h. *V. cholerae* and *E. coli* were normalized to OD<sub>600</sub> = 1 and  
309 mixed in a 1:5 ratio. A 2 µL aliquot of a mixed culture was inoculated on LB agar and allowed

310 to dry. Cells were imaged before and after a 3 h incubation at 37 °C and 96-100% humidity  
311 using an Eclipse Ti-E Nikon (NY, USA) inverted microscope with a Perfect Focus System and  
312 camera previously described ([11](#)). The images were processed with ImageJ ([34](#)).

313

#### 314 Motility assay

315 Overnight cultures of *V. cholerae* were diluted to  $OD_{600} = 0.1$ , and 1  $\mu$ L inoculated onto pre-  
316 dried LB plates with 0.3 % agar. Cells were incubated at 37 °C statically overnight, with motility  
317 determined by measuring the swarming diameter.

318

#### 319 Transformation assay

320 Chitin-induced transformation frequency was measured as described with defined artificial  
321 sea water (450 mM NaCl, 10 mM KCl, 9 mM CaCl<sub>2</sub>, 30 mM MgCl<sub>2</sub>·6H<sub>2</sub>O, and 16 mM  
322 MgSO<sub>4</sub>·7H<sub>2</sub>O; pH 7.8) ([56](#)). Bacteria were incubated with extracellular DNA in triplicate wells  
323 containing crab shell tabs, and transformation frequency calculated as Spectinomycin  
324 resistant (Spec<sup>r</sup>) CFU ml<sup>-1</sup> / total CFU ml<sup>-1</sup>.

325

#### 326 QS-dependent Luciferase assay

327 Overnight cultures of the bacterial strains were diluted to  $OD_{600} = 0.001$  in liquid LB in  
328 microtiter plates and incubated at 37 °C with shaking. The  $OD_{600}$  and luminescence were

329 measured each h with a BioTek (VT, USA) Synergy H1 microplate reader to calculate Relative  
330 Luminescence Units (RLU) as Luminescence/OD<sub>600</sub>. Data were collected when OD<sub>600</sub> = 0.6-0.8.  
331 LB medium was used as the blank for the OD<sub>600</sub> and luminescence.

332

### 333 GFP transcriptional reporter quantification

334 Overnight cultures of *V. cholerae* or *E. coli* were diluted 1:100 and incubated at 37 °C for 3 h.  
335 To enhance the translation of *gfp*, the sequence of the native RBS (12 nt sequence) was  
336 replaced with the T7 RBS (12 nt sequence) in the primers used to make the fusions. Cm was  
337 added to maintain the plasmid-borne versions of reporters that were cloned into plasmid  
338 pSLS3. 300 µL aliquots were transferred to black microtiter plates to read the OD<sub>600</sub> and GFP  
339 fluorescence (Excitation: 485, Emission: 528) with a BioTek Synergy H1 microplate reader (VT,  
340 USA) to calculate Relative Luminescence Units (RLU) as Luminescence/OD<sub>600</sub>. LB medium was  
341 used as the blank for the OD<sub>600</sub>. Strain lacking reporters served as blanks for GFP fluorescence.  
342 RFU was calculated by blanked GFP fluorescence / blanked OD<sub>600</sub>.

343

### 344 T6-mediated killing assay

345 Overnight cultures of *V. cholerae* or *E. coli* were back-diluted 1:100 and incubated at 37 °C for  
346 3 h. *V. cholerae* strains and the Cm<sup>r</sup> *E. coli* target were normalized to OD<sub>600</sub> = 1 and then mixed  
347 at a ratio of either 10:1 or 1:5. A 50 µL mixed culture was spotted onto LB agar and dried. After

348 a 3 h incubation at 37°C, cells were resuspended in 5 ml of LB, and serial dilutions were  
349 conducted. Finally, the resuspension was inoculated on a LB agar containing Cm to select for  
350 the surviving *E. coli*, which was incubated overnight at 37 °C and the *E. coli* colonies were  
351 counted and shown as CFU mL<sup>-1</sup>.

352

### 353 RNA extraction and determination of the +1 of transcription by 5'-RACE

354 Overnight cultures of *V. cholerae* were back-diluted 1:100 and incubated at 37 °C for 3 h before  
355 lysing. Three independent cultures of T6-active *V. cholerae* C6706 *qstR\** and 3223-74 WT were  
356 harvested by centrifugation at room temperature. RNA isolation, genomic DNA removal, and  
357 RNA clean-up were performed as previously described (57). Genomic DNA contamination was  
358 confirmed by conducting PCR with primer pair specific for 16S rRNA loci (*rrsA*) as previously  
359 described (Table S3) (58). RNA purity was confirmed by NanoDrop (260 / 280 ≈ 2.0).

360

361 5'-RACE (Invitrogen™ - MA, USA) was conducted according to the manufacturer's protocol  
362 with slight modifications. Specifically, SuperScript™ IV reverse transcriptase (Invitrogen™ -  
363 MA, USA) was used to complete the first strand cDNA synthesis. Two *vipA*-specific primers  
364 (GT3056 and GT3060) were used to identify the +1 of transcription for the major T6 gene  
365 cluster (Table S3). PCR products were purified with QIAquick PCR purification kit (Qiagen -  
366 Hilden, Germany) or Zymoclean gel DNA recovery kit (Zymo Research - CA, USA). Sanger

367 sequencing was conducted by Eton Bioscience Inc. (NC, USA) with the corresponding nesting  
368 primer (Table S3).

369

### 370 Genomic and phylogenetic analysis

371 Genome sequences of *V. cholerae* strains were collected from NCBI Genome database (Table  
372 S4) ([59](#)). The IGR upstream of major T6 cluster was extracted, aligned, and presented using  
373 BLAST+ v2.2.18 ([60](#)), MUSCLE v3.8 (<https://www.ebi.ac.uk/Tools/msa/muscle/>) ([61](#), [62](#)), and  
374 ESPript 3.0 (<https://esprict.ibcp.fr/>) ([37](#)). The DNA sequence of the IGR was used for  
375 phylogenetic analysis, and the phylogenetic tree was constructed by the Maximum likelihood  
376 method using MEGA11 ([63](#), [64](#)).

377

378 For 2012V-1001, 2011EL-1939, 2011EL-1938, and 2011EL-1141 that do not have genome  
379 sequence available, colony PCR was conducted to amplify the 5' IGR of the major T6 cluster  
380 using OneTaq DNA Polymerase (New England Biolabs – MA, USA). PCR products were  
381 confirmed with gel electrophoresis and Sanger sequencing by Eton Bioscience Inc. (NC, USA)  
382 with the identical primer pair (Table S3).

383

### 384 **Acknowledgements**

385 We would like to thank Dr. Jyl S. Matson for assistance with RNA isolation and Dr. Marvin

386 Whiteley and current and past members of the Hammer Lab for critiques and discussion,

387 specifically, Dr. Samit Watve and Rakin Choudhury for bioinformatic advice and assistance.

388

389 **Competing interests**

390 The authors have no competing interests.



## 391 **References**

- 392 1. Wray GA. The evolutionary significance of cis-regulatory mutations. *Nature reviews*  
393 *Genetics*. 2007;8(3):206-16. Epub 2007/02/17. doi: 10.1038/nrg2063. PubMed PMID:  
394 17304246.
- 395 2. Stern DL, Orgogozo V. THE LOCI OF EVOLUTION: HOW PREDICTABLE IS GENETIC  
396 EVOLUTION? *Evolution*. 2008;62(9):2155-77. doi: [https://doi.org/10.1111/j.1558-](https://doi.org/10.1111/j.1558-5646.2008.00450.x)  
397 [5646.2008.00450.x](https://doi.org/10.1111/j.1558-5646.2008.00450.x).
- 398 3. Wittkopp PJ, Kalay G. Cis-regulatory elements: molecular mechanisms and evolutionary  
399 processes underlying divergence. *Nature reviews Genetics*. 2011;13(1):59-69. Epub  
400 2011/12/07. doi: 10.1038/nrg3095. PubMed PMID: 22143240.
- 401 4. Norsworthy AN, Visick KL. Signaling between two interacting sensor kinases promotes  
402 biofilms and colonization by a bacterial symbiont. *Mol Microbiol*. 2015;96(2):233-48. Epub  
403 2015/01/15. doi: 10.1111/mmi.12932. PubMed PMID: 25586643; PMCID: PMC4465548.
- 404 5. Mandel MJ, Wollenberg MS, Stabb EV, Visick KL, Ruby EG. A single regulatory gene is  
405 sufficient to alter bacterial host range. *Nature*. 2009;458(7235):215-8. Epub 2009/02/03. doi:  
406 10.1038/nature07660. PubMed PMID: 19182778; PMCID: PMC2713604.
- 407 6. Perez JC, Groisman EA. Evolution of transcriptional regulatory circuits in bacteria. *Cell*.  
408 2009;138(2):233-44. Epub 2009/07/28. doi: 10.1016/j.cell.2009.07.002. PubMed PMID:  
409 19632175; PMCID: PMC2726713.

- 410 7. Dziejman M, Balon E, Boyd D, Fraser CM, Heidelberg JF, Mekalanos JJ. Comparative  
411 genomic analysis of *Vibrio cholerae*: genes that correlate with cholera endemic and pandemic  
412 disease. *Proceedings of the National Academy of Sciences of the United States of America*.  
413 2002;99(3):1556-61. Epub 2002/01/31. doi: 10.1073/pnas.042667999. PubMed PMID:  
414 11818571; PMCID: PMC122229.
- 415 8. Faruque SM, Albert MJ, Mekalanos JJ. Epidemiology, Genetics, and Ecology of  
416 Toxigenic *Vibrio cholerae*. *Microbiology and Molecular Biology Reviews*.  
417 1998;62(4):1301-14. doi: doi:10.1128/MMBR.62.4.1301-1314.1998.
- 418 9. Karaolis DKR, Johnson JA, Bailey CC, Boedeker EC, Kaper JB, Reeves PR. A *Vibrio*  
419 *cholerae* pathogenicity island associated with epidemic and pandemic strains.  
420 *Proceedings of the National Academy of Sciences*. 1998;95(6):3134-9. doi:  
421 10.1073/pnas.95.6.3134.
- 422 10. Pruzzo C, Vezzulli L, Colwell RR. Global impact of *Vibrio cholerae* interactions with chitin.  
423 *Environ Microbiol*. 2008;10(6):1400-10. Epub 2008/03/04. doi: 10.1111/j.1462-  
424 2920.2007.01559.x. PubMed PMID: 18312392.
- 425 11. Crisan CV, Chande AT, Williams K, Raghuram V, Rishishwar L, Steinbach G, Watve SS,  
426 Yunker P, Jordan IK, Hammer BK. Analysis of *Vibrio cholerae* genomes identifies new type VI  
427 secretion system gene clusters. *Genome Biol*. 2019;20(1):163. Epub 2019/08/14. doi:  
428 10.1186/s13059-019-1765-5. PubMed PMID: 31405375; PMCID: PMC6691524.

- 429 12. MacIntyre DL, Miyata ST, Kitaoka M, Pukatzki S. The *Vibrio cholerae* type VI secretion  
430 system displays antimicrobial properties. *Proceedings of the National Academy of Sciences of*  
431 *the United States of America*. 2010;107(45):19520-4. Epub 2010/10/27. doi:  
432 10.1073/pnas.1012931107. PubMed PMID: 20974937; PMCID: PMC2984155.
- 433 13. Gallegos-Monterrosa R, Coulthurst SJ. The ecological impact of a bacterial weapon:  
434 microbial interactions and the Type VI secretion system. *FEMS Microbiol Rev*. 2021;45(6). Epub  
435 2021/06/23. doi: 10.1093/femsre/fuab033. PubMed PMID: 34156081; PMCID: PMC8632748.
- 436 14. Hussain NAS, Kirchberger PC, Case RJ, Boucher YF. Modular Molecular Weaponry Plays a  
437 Key Role in Competition Within an Environmental *Vibrio cholerae* Population. *Frontiers in*  
438 *Microbiology*. 2021;12(979). doi: 10.3389/fmicb.2021.671092.
- 439 15. Ishikawa T, Sabharwal D, Bröms J, Milton DL, Sjöstedt A, Uhlin BE, Wai SN, Camilli A.  
440 Pathoadaptive Conditional Regulation of the Type VI Secretion System in *Vibrio cholerae* O1  
441 Strains. *Infection and Immunity*. 2012;80(2):575-84. doi: doi:10.1128/IAI.05510-11.
- 442 16. Kirchberger PC, Unterweger D, Provenzano D, Pukatzki S, Boucher Y. Sequential  
443 displacement of Type VI Secretion System effector genes leads to evolution of diverse  
444 immunity gene arrays in *Vibrio cholerae*. *Scientific Reports*. 2017;7(1):45133. doi:  
445 10.1038/srep45133.
- 446 17. Santoriello FJ, Pukatzki S. When the pandemic opts for the lockdown: Secretion system  
447 evolution in the cholera bacterium. *Microb Cell*. 2021;8(3):69-72. Epub 2021/03/09. doi:

- 448 10.15698/mic2021.03.744. PubMed PMID: 33681340; PMCID: PMC7919388.
- 449 18. Unterweger D, Miyata ST, Bachmann V, Brooks TM, Mullins T, Kostiuk B, Provenzano D,  
450 Pukatzki S. The *Vibrio cholerae* type VI secretion system employs diverse effector modules for  
451 intraspecific competition. *Nature Communications*. 2014;5(1):3549. doi:  
452 10.1038/ncomms4549.
- 453 19. Kostiuk B, Santoriello FJ, Diaz-Satizabal L, Bisaro F, Lee K-J, Dhody AN, Provenzano D,  
454 Unterweger D, Pukatzki S. Type VI secretion system mutations reduced competitive fitness of  
455 classical *Vibrio cholerae* biotype. *Nature Communications*. 2021;12(1):6457. doi:  
456 10.1038/s41467-021-26847-y.
- 457 20. Crisan CV, Chandrashekar H, Everly C, Steinbach G, Hill SE, Yunker PJ, Lieberman RR,  
458 Hammer BK, Ellermeier CD. A New Contact Killing Toxin Permeabilizes Cells and Belongs to a  
459 Broadly Distributed Protein Family. *mSphere*. 2021;6(4):e00318-21. doi:  
460 doi:10.1128/mSphere.00318-21.
- 461 21. Drebes Dörr NC, Blokesch M. Interbacterial competition and anti-predatory behaviour of  
462 environmental *Vibrio cholerae* strains. *Environmental Microbiology*. 2020;22(10):4485-504.  
463 doi: <https://doi.org/10.1111/1462-2920.15224>.
- 464 22. Crisan CV, Hammer BK. The *Vibrio cholerae* type VI secretion system: toxins, regulators  
465 and consequences. *Environ Microbiol*. 2020;22(10):4112-22. Epub 2020/03/07. doi:  
466 10.1111/1462-2920.14976. PubMed PMID: 32133757.

- 467 23. Jaskolska M, Stutzmann S, Stoudmann C, Blokesch M. QstR-dependent regulation of  
468 natural competence and type VI secretion in *Vibrio cholerae*. *Nucleic Acids Res.*  
469 2018;46(20):10619-34. Epub 2018/08/14. doi: 10.1093/nar/gky717. PubMed PMID:  
470 30102403; PMCID: PMC6237807.
- 471 24. Joshi A, Kostiuk B, Rogers A, Teschler J, Pukatzki S, Yildiz FH. Rules of Engagement: The  
472 Type VI Secretion System in *Vibrio cholerae*. *Trends Microbiol.* 2017;25(4):267-79. Epub  
473 2016/12/29. doi: 10.1016/j.tim.2016.12.003. PubMed PMID: 28027803; PMCID:  
474 PMC5365375.
- 475 25. Joshi A, Mahmoud SA, Kim SK, Ogdahl JL, Lee VT, Chien P, Yildiz FH. c-di-GMP inhibits  
476 LonA-dependent proteolysis of TfoY in *Vibrio cholerae*. *PLoS Genet.* 2020;16(6):e1008897.  
477 Epub 2020/06/27. doi: 10.1371/journal.pgen.1008897. PubMed PMID: 32589664; PMCID:  
478 PMC7371385.
- 479 26. Metzger LC, Stutzmann S, Scignari T, Van der Henst C, Matthey N, Blokesch M.  
480 Independent Regulation of Type VI Secretion in *Vibrio cholerae* by TfoX and TfoY. *Cell Rep.*  
481 2016;15(5):951-8. Epub 2016/04/28. doi: 10.1016/j.celrep.2016.03.092. PubMed PMID:  
482 27117415; PMCID: PMC4858559.
- 483 27. Lo Scudato M, Blokesch M. A transcriptional regulator linking quorum sensing and chitin  
484 induction to render *Vibrio cholerae* naturally transformable. *Nucleic Acids Res.*  
485 2013;41(6):3644-58. Epub 2013/02/06. doi: 10.1093/nar/gkt041. PubMed PMID: 23382174;

486 PMCID: PMC3616704.

487 28. Meibom KL, Blokesch M, Dolganov NA, Wu CY, Schoolnik GK. Chitin induces natural  
488 competence in *Vibrio cholerae*. *Science*. 2005;310(5755):1824-7. Epub 2005/12/17. doi:  
489 10.1126/science.1120096. PubMed PMID: 16357262.

490 29. Watve SS, Thomas J, Hammer BK. CytR Is a Global Positive Regulator of Competence,  
491 Type VI Secretion, and Chitinases in *Vibrio cholerae*. *PLoS One*. 2015;10(9):e0138834. Epub  
492 2015/09/25. doi: 10.1371/journal.pone.0138834. PubMed PMID: 26401962; PMCID:  
493 PMC4581735.

494 30. Tsou AM, Cai T, Liu Z, Zhu J, Kulkarni RV. Regulatory targets of quorum sensing in *Vibrio*  
495 *cholerae*: evidence for two distinct HapR-binding motifs. *Nucleic Acids Res*. 2009;37(8):2747-  
496 56. Epub 2009/03/12. doi: 10.1093/nar/gkp121. PubMed PMID: 19276207; PMCID:  
497 PMC2677876.

498 31. Bernardy EE, Turnsek MA, Wilson SK, Tarr CL, Hammer BK, Liu S-J. Diversity of Clinical and  
499 Environmental Isolates of *Vibrio cholerae* in Natural Transformation and Contact-Dependent  
500 Bacterial Killing Indicative of Type VI Secretion System Activity. *Applied and Environmental*  
501 *Microbiology*. 2016;82(9):2833-42. doi: doi:10.1128/AEM.00351-16.

502 32. Jobling MG, Holmes RK. Characterization of hapR, a positive regulator of the *Vibrio*  
503 *cholerae* HA/protease gene hap, and its identification as a functional homologue of the *Vibrio*  
504 *harveyi* luxR gene. *Molecular Microbiology*. 1997;26(5):1023-34. doi:

505 <https://doi.org/10.1046/j.1365-2958.1997.6402011.x>.

- 506 33. Pursley BR, Maiden MM, Hsieh ML, Fernandez NL, Severin GB, Waters CM. Cyclic di-GMP  
507 Regulates TfoY in *Vibrio cholerae* To Control Motility by both Transcriptional and  
508 Posttranscriptional Mechanisms. *J Bacteriol.* 2018;200(7). Epub 2018/01/10. doi:  
509 10.1128/JB.00578-17. PubMed PMID: 29311281; PMCID: PMC5847662.
- 510 34. Schneider CA, Rasband WS, Eliceiri KW. NIH Image to ImageJ: 25 years of image analysis.  
511 *Nat Methods.* 2012;9(7):671-5. Epub 2012/08/30. doi: 10.1038/nmeth.2089. PubMed PMID:  
512 22930834; PMCID: PMC5554542.
- 513 35. Zheng J, Shin OS, Cameron DE, Mekalanos JJ. Quorum sensing and a global regulator TsrA  
514 control expression of type VI secretion and virulence in *Vibrio cholerae*.  
515 *Proceedings of the National Academy of Sciences.* 2010;107(49):21128-33. doi:  
516 10.1073/pnas.1014998107.
- 517 36. Joelsson A, Liu Z, Zhu J. Genetic and phenotypic diversity of quorum-sensing systems in  
518 clinical and environmental isolates of *Vibrio cholerae*. *Infect Immun.* 2006;74(2):1141-7. Epub  
519 2006/01/24. doi: 10.1128/IAI.74.2.1141-1147.2006. PubMed PMID: 16428762; PMCID:  
520 PMC1360356.
- 521 37. Robert X, Gouet P. Deciphering key features in protein structures with the new ENDscript  
522 server. *Nucleic Acids Res.* 2014;42(Web Server issue):W320-4. Epub 2014/04/23. doi:  
523 10.1093/nar/gku316. PubMed PMID: 24753421; PMCID: PMC4086106.

- 524 38. Holowka J, Zakrzewska-Czerwinska J. Nucleoid Associated Proteins: The Small Organizers  
525 That Help to Cope With Stress. *Front Microbiol.* 2020;11:590. Epub 2020/05/07. doi:  
526 10.3389/fmicb.2020.00590. PubMed PMID: 32373086; PMCID: PMC7177045.
- 527 39. Ayala JC, Silva AJ, Benitez JA. H-NS: an overarching regulator of the *Vibrio cholerae* life  
528 cycle. *Res Microbiol.* 2017;168(1):16-25. Epub 2016/08/06. doi:  
529 10.1016/j.resmic.2016.07.007. PubMed PMID: 27492955; PMCID: PMC5241179.
- 530 40. Chaparian RR, Olney SG, Hustmyer CM, Rowe-Magnus DA, van Kessel JC. Integration host  
531 factor and LuxR synergistically bind DNA to coactivate quorum-sensing genes in *Vibrio harveyi*.  
532 *Mol Microbiol.* 2016;101(5):823-40. Epub 2016/05/19. doi: 10.1111/mmi.13425. PubMed  
533 PMID: 27191515.
- 534 41. Papenfort K, Forstner KU, Cong JP, Sharma CM, Bassler BL. Differential RNA-seq of *Vibrio*  
535 *cholerae* identifies the VqmR small RNA as a regulator of biofilm formation. *Proceedings of*  
536 *the National Academy of Sciences of the United States of America.* 2015;112(7):E766-75. Epub  
537 2015/02/04. doi: 10.1073/pnas.1500203112. PubMed PMID: 25646441; PMCID:  
538 PMC4343088.
- 539 42. Shao Y, Bassler BL. Quorum regulatory small RNAs repress type VI secretion in *Vibrio*  
540 *cholerae*. *Mol Microbiol.* 2014;92(5):921-30. Epub 2014/04/05. doi: 10.1111/mmi.12599.  
541 PubMed PMID: 24698180; PMCID: PMC4038675.
- 542 43. Drebes Dörr NC, Proutière A, Jaskólska M, Stutzmann S, Bader L, Blokesch M. A single



543 nucleotide polymorphism determines constitutive versus inducible type VI secretion in  
544 *Vibrio cholerae*. bioRxiv. 2022:2022.01.28.478222. doi:  
545 10.1101/2022.01.28.478222.

546 44. Gourse RL, Ross W, Gaal T. UPs and downs in bacterial transcription initiation: the role of  
547 the alpha subunit of RNA polymerase in promoter recognition. Mol Microbiol.  
548 2000;37(4):687-95. Epub 2000/09/06. doi: 10.1046/j.1365-2958.2000.01972.x. PubMed  
549 PMID: 10972792.

550 45. Guo C, McDowell IC, Nodzinski M, Scholtens DM, Allen AS, Lowe WL, Reddy TE.  
551 Transversions have larger regulatory effects than transitions. BMC Genomics. 2017;18(1):394.  
552 doi: 10.1186/s12864-017-3785-4.

553 46. Slattery M, Zhou T, Yang L, Dantas Machado AC, Gordân R, Rohs R. Absence of a simple  
554 code: how transcription factors read the genome. Trends in Biochemical Sciences.  
555 2014;39(9):381-99. doi: 10.1016/j.tibs.2014.07.002.

556 47. MacKenzie KD, Wang Y, Musicha P, Hansen EG, Palmer MB, Herman DJ, Feasey NA, White  
557 AP. Parallel evolution leading to impaired biofilm formation in invasive Salmonella strains.  
558 PLoS Genet. 2019;15(6):e1008233. Epub 2019/06/25. doi: 10.1371/journal.pgen.1008233.  
559 PubMed PMID: 31233504; PMCID: PMC6611641.

560 48. Osborne SE, Walthers D, Tomljenovic AM, Mulder DT, Silphaduang U, Duong N, Lowden  
561 MJ, Wickham ME, Waller RF, Kenney LJ, Coombes BK. Pathogenic adaptation of intracellular

- 562 bacteria by rewiring a *cis*-regulatory input function. Proceedings of the National  
563 Academy of Sciences. 2009;106(10):3982-7. doi: 10.1073/pnas.0811669106.
- 564 49. Unterweger D, Kitaoka M, Miyata ST, Bachmann V, Brooks TM, Moloney J, Sosa O, Silva D,  
565 Duran-Gonzalez J, Provenzano D, Pukatzki S. Constitutive type VI secretion system expression  
566 gives *Vibrio cholerae* intra- and interspecific competitive advantages. PLoS One.  
567 2012;7(10):e48320. Epub 2012/10/31. doi: 10.1371/journal.pone.0048320. PubMed PMID:  
568 23110230; PMCID: PMC3482179.
- 569 50. Fu Y, Waldor MK, Mekalanos JJ. Tn-Seq analysis of *Vibrio cholerae* intestinal colonization  
570 reveals a role for T6SS-mediated antibacterial activity in the host. Cell Host Microbe.  
571 2013;14(6):652-63. Epub 2013/12/18. doi: 10.1016/j.chom.2013.11.001. PubMed PMID:  
572 24331463; PMCID: PMC3951154.
- 573 51. Zhao W, Caro F, Robins W, Mekalanos JJ. Antagonism toward the intestinal microbiota  
574 and its effect on *Vibrio cholerae* virulence. Science. 2018;359(6372):210-3. Epub 2018/01/13.  
575 doi: 10.1126/science.aap8775. PubMed PMID: 29326272; PMCID: PMC8010019.
- 576 52. Logan SL, Thomas J, Yan J, Baker RP, Shields DS, Xavier JB, Hammer BK, Parthasarathy R.  
577 The *Vibrio cholerae* type VI secretion system can modulate host intestinal  
578 mechanics to displace gut bacterial symbionts. Proceedings of the National Academy of  
579 Sciences. 2018;115(16):E3779-E87. doi: 10.1073/pnas.1720133115.
- 580 53. Seal S, Dharmarajan G, Khan I. Evolution of pathogen tolerance and emerging infections:

- 581 A missing experimental paradigm. *Elife*. 2021;10. Epub 2021/09/22. doi: 10.7554/eLife.68874.
- 582 PubMed PMID: 34544548; PMCID: PMC8455132.
- 583 54. San JE, Baichoo S, Kanzi A, Moosa Y, Lessells R, Fonseca V, Mogaka J, Power R, de Oliveira
- 584 T. Current Affairs of Microbial Genome-Wide Association Studies: Approaches, Bottlenecks
- 585 and Analytical Pitfalls. *Front Microbiol*. 2019;10:3119. Epub 2020/02/23. doi:
- 586 10.3389/fmicb.2019.03119. PubMed PMID: 32082269; PMCID: PMC7002396.
- 587 55. Skorupski K, Taylor RK. Positive selection vectors for allelic exchange. *Gene*.
- 588 1996;169(1):47-52. Epub 1996/02/22. doi: 10.1016/0378-1119(95)00793-8. PubMed PMID:
- 589 8635748.
- 590 56. Watve SS, Bernardy EE, Hammer BK. *Vibrio cholerae*: Measuring Natural Transformation
- 591 Frequency. *Curr Protoc Microbiol*. 2014;35:6A 4 1-12. Epub 2014/11/05. doi:
- 592 10.1002/9780471729259.mc06a04s35. PubMed PMID: 25367272.
- 593 57. Matson JS. Preparation of *Vibrio cholerae* Samples for RNA-seq Analysis. *Methods Mol*
- 594 *Biol*. 2018;1839:29-38. Epub 2018/07/27. doi: 10.1007/978-1-4939-8685-9\_3. PubMed PMID:
- 595 30047051.
- 596 58. Manera K, Caro F, Li H, Pei TT, Hersch SJ, Mekalanos JJ, Dong TG. Sensing of intracellular
- 597 Hcp levels controls T6SS expression in *Vibrio cholerae*. *Proceedings of the National Academy*
- 598 *of Sciences of the United States of America*. 2021;118(25). Epub 2021/06/24. doi:
- 599 10.1073/pnas.2104813118. PubMed PMID: 34161288; PMCID: PMC8237632.

- 600 59. Sayers EW, Agarwala R, Bolton EE, Brister JR, Canese K, Clark K, Connor R, Fiorini N, Funk  
601 K, Hefferon T, Holmes JB, Kim S, Kimchi A, Kitts PA, Lathrop S, Lu Z, Madden TL, Marchler-Bauer  
602 A, Phan L, Schneider VA, Schoch CL, Pruitt KD, Ostell J. Database resources of the National  
603 Center for Biotechnology Information. *Nucleic Acids Res.* 2019;47(D1):D23-D8. Epub  
604 2018/11/06. doi: 10.1093/nar/gky1069. PubMed PMID: 30395293; PMCID: PMC6323993.
- 605 60. Camacho C, Coulouris G, Avagyan V, Ma N, Papadopoulos J, Bealer K, Madden TL. BLAST+:  
606 architecture and applications. *BMC Bioinformatics.* 2009;10:421. Epub 2009/12/17. doi:  
607 10.1186/1471-2105-10-421. PubMed PMID: 20003500; PMCID: PMC2803857.
- 608 61. Edgar RC. MUSCLE: multiple sequence alignment with high accuracy and high throughput.  
609 *Nucleic Acids Res.* 2004;32(5):1792-7. Epub 2004/03/23. doi: 10.1093/nar/gkh340. PubMed  
610 PMID: 15034147; PMCID: PMC390337.
- 611 62. Madeira F, Park YM, Lee J, Buso N, Gur T, Madhusoodanan N, Basutkar P, Tivey ARN,  
612 Potter SC, Finn RD, Lopez R. The EMBL-EBI search and sequence analysis tools APIs in 2019.  
613 *Nucleic Acids Res.* 2019;47(W1):W636-W41. Epub 2019/04/13. doi: 10.1093/nar/gkz268.  
614 PubMed PMID: 30976793; PMCID: PMC6602479.
- 615 63. Felsenstein J. Evolutionary trees from DNA sequences: a maximum likelihood approach.  
616 *J Mol Evol.* 1981;17(6):368-76. Epub 1981/01/01. doi: 10.1007/BF01734359. PubMed PMID:  
617 7288891.
- 618 64. Tamura K, Stecher G, Kumar S. MEGA11: Molecular Evolutionary Genetics Analysis

619 Version 11. Mol Biol Evol. 2021;38(7):3022-7. Epub 2021/04/24. doi:

620 10.1093/molbev/msab120. PubMed PMID: 33892491; PMCID: PMC8233496.

621
